# Supplementary material for: Evaluation of a Treadmill-Based Submaximal Fitness Test in Pugs, and Collecting Breed-Specific Information on Brachycephalic Obstructive Airway Syndrome
Source: MDPI journal article supplement (doi:10.3390/ani12121585), 2022-06-19
Supplement: s1 [file s1]

## Supplementary Materials

Table S1: Assessment of respiratory noises (RN) and breathing pattern in form of intensity of inspiratory effort and possible dyspnoea.

|                                 |                      |          |                     |        |
|---------------------------------|----------------------|----------|---------------------|--------|
| RN audible without stethoscope  | Yes                  |          | No                  |        |
|                                 | Intermittent         |          | Constant            |        |
|                                 | Mild                 | Moderate | Severe              |        |
| RN audible with stethoscope     | Yes                  |          | No                  |        |
|                                 | Intermittent         |          | Constant            |        |
|                                 | Mild                 | Moderate | Severe              |        |
| Association <sup>A</sup>        | Stertor (pharyngeal) |          | Stridor (laryngeal) |        |
| Inspiratory effort <sup>B</sup> | Not present          | Mild     | Moderate            | Severe |
| Dyspnoea <sup>C</sup>           | Not present          | Mild     | Moderate            | Severe |

<sup>A</sup> Association: Stertor: snoring sound; Stridor: harsh, high-pitched sound; not assignable: sound not identifiable as stridor or stertor.

<sup>B</sup> Inspiratory effort: mild: regular breathing cycle with minimal additional use of the diaphragm; moderate: distinct use of diaphragm and accessory respiratory muscles; severe: intensive use of the diaphragm and accessory respiratory muscles.

<sup>C</sup> Dyspnoea: mild: Signs of discomfort; moderate: irregular breathing; severe: irregular breathing with clear signs of discomfort.

Table S2: Measurements as described in Sutter et al. (2008).

| Measurement              | Description                                                                                                       |
|--------------------------|-------------------------------------------------------------------------------------------------------------------|
| Skull length             | The distance from the occipital protuberance to the plane between the punctae lacrimale.                          |
| Muzzle length            | The distance from the rostral end of the planum nasale to the plane between the punctae lacrimale.                |
| Craniofacial ratio (CFR) | Ratio from muzzle length / skull length.                                                                          |
| Eye width                | The linear distance between the left and right punctae lacrimale.                                                 |
| Chest girth              | The circumference of the deepest part of the thorax.                                                              |
| Neck girth               | The circumference of the neck at the median distance between the external occipital protuberance and the withers. |
| Height                   | The linear distance from the ground to the cranial angle of the scapula.                                          |
| Body length              | The distance along the body from the dorsal plane of the withers to the point where the tail meets the body.      |
