# Supplementary material for: Evaluation of a Treadmill-Based Submaximal Fitness Test in Pugs, and Collecting Breed-Specific Information on Brachycephalic Obstructive Airway Syndrome
Source: MDPI journal article supplement (doi:10.3390/ani12121585), 2022-06-19
Supplement: s1 [file s1]

# Supplementary Materials

## Questionnaire

### Medical history

|                                |  |
|--------------------------------|--|
| <b>Pre-existing conditions</b> |  |
| <b>Medication</b>              |  |
| <b>Vaccination status</b>      |  |
| <b>De-worming</b>              |  |
| <b>Preceding operations</b>    |  |

**Are you breeding dogs or have you talked about breathing problems with your breeder before purchasing your dog?**

Yes ☐ No ☐

**If yes, what is your opinion as a breeder/ as an informed purchaser (multiple choices possible)?**

- ☐ Problems may occur in this breed
- ☐ There are no breathing problems in this breed
- ☐ Dogs of my kennel do not have breathing problems
- ☐ Only dogs that are not of a good kennel have breathing problems
- ☐ Both parents of this patient do not have breathing problems
- ☐ Breathing problems have occurred in this particular kennel
- ☐ Only dogs from abroad present with breathing problems
- ☐ Other (please state):

Does your dog have respiratory problems? Yes ☐ No ☐

**If YES**

Diagnosis? \_\_\_\_\_

Treatment?

Operation: \_\_\_\_\_ none ☐

Medication: \_\_\_\_\_ none ☐

At what age did you first notice the problems? \_\_\_\_\_ Years \_\_\_\_\_ Months

What signs did you notice first? (please write out)

\_\_\_\_\_

Over what period of time did the problems occur?

|          |                   |                            |                               |                                   |
|----------|-------------------|----------------------------|-------------------------------|-----------------------------------|
| Suddenly | Over several days | Gradually over a few weeks | Gradually over several months | Gradually over more than one year |
|----------|-------------------|----------------------------|-------------------------------|-----------------------------------|

Do you think this condition is ...

|       |            |                  |                                   |                                           |
|-------|------------|------------------|-----------------------------------|-------------------------------------------|
| Fixed | Gets worse | Remains the same | Inconsistent (but always present) | inconsistent (partially free of problems) |
|-------|------------|------------------|-----------------------------------|-------------------------------------------|

Does your dog suffer from his breathing problem?

(1 = does not suffer, 10 = suffers severely)

|   |   |   |   |   |   |   |   |   |    |
|---|---|---|---|---|---|---|---|---|----|
| 1 | 2 | 3 | 4 | 5 | 6 | 7 | 8 | 9 | 10 |
|---|---|---|---|---|---|---|---|---|----|

**What is your dog like?** Use the choices mentioned below to describe the character of your dog (multiple choices possible)?

- ☐ relaxed
- ☐ lazy
- ☐ chipper
- ☐ active
- ☐ curious
- ☐ shy
- ☐ brave

- ☐ aggressive
- ☐ submissive
- ☐ calm
- ☐ skittish
- ☐ sensitive
- ☐ inconspicuous
- ☐ dominant

- ☐ cheerful
- ☐ social (regarding other dogs)
- ☐ social (regarding other humans)
- ☐ antisocial (regarding other dogs)
- ☐ antisocial (regarding other humans)
- ☐ well-behaved

What is your dog's favourite activity? \_\_\_\_\_

**Is your dog making sounds like the following awake and at rest\*?**

☐ snoring    ☐ grunting    ☐ wheezing    ☐ stertorous breathing    ☐ none

**How often do you notice these sounds?**

| Constantly | Often (> once daily) | Daily (1 x per day) | Regularly (1x per week) | Rarely ( < 1x per month) | Never |
|------------|----------------------|---------------------|-------------------------|--------------------------|-------|
|------------|----------------------|---------------------|-------------------------|--------------------------|-------|

\* at rest = in a relaxed mood, resting/laying down

**What does your dog's breathing sound like under the following circumstances?**

|                                          | Very quiet | Panting, but no snoring/ wheezing | Light/mild snoring/ wheezing | Some snoring/ wheezing | Frequent snoring/ wheezing | Continuous snoring/ wheezing |
|------------------------------------------|------------|-----------------------------------|------------------------------|------------------------|----------------------------|------------------------------|
| At rest                                  |            |                                   |                              |                        |                            |                              |
| Daily life activity                      |            |                                   |                              |                        |                            |                              |
| During exercise, e.g. on a walk, at play |            |                                   |                              |                        |                            |                              |
| Asleep                                   |            |                                   |                              |                        |                            |                              |

**How often does your dog show restrictions of breathing in the following situations?**

|                                          | Never | Rarely | Monthly | Weekly | Daily | More than daily |
|------------------------------------------|-------|--------|---------|--------|-------|-----------------|
| At rest                                  |       |        |         |        |       |                 |
| Daily life activity                      |       |        |         |        |       |                 |
| During exercise, e.g. on a walk, at play |       |        |         |        |       |                 |
| Asleep                                   |       |        |         |        |       |                 |

**How many walks do you take and how long are they (average per day):**

Number: \_\_\_\_\_ Duration: \_\_\_\_\_

**My dog is exercised in sports:**    Yes   ☐    No   ☐

Sport type: \_\_\_\_\_ Frequency: \_\_\_\_\_/Week

**My dog lives in a household with other animals:** Yes ☐ No ☐

If yes: What kind of animals? How many?

|                                                       | Strongly agree | Rather agree | Neither | Rather not agree | Do not agree | No specification |
|-------------------------------------------------------|----------------|--------------|---------|------------------|--------------|------------------|
| My dog pants during exercise.                         |                |              |         |                  |              |                  |
| My dog likes to play with other dogs.                 |                |              |         |                  |              |                  |
| When playing, my dog can keep up with the other dogs. |                |              |         |                  |              |                  |
| When playing, my dog runs a lot.                      |                |              |         |                  |              |                  |
| After playing, my dog needs a long rest.              |                |              |         |                  |              |                  |
| My dog likes to explore the surroundings on walks.    |                |              |         |                  |              |                  |
| My dog is just as resilient as other dogs.            |                |              |         |                  |              |                  |

**How long can you walk with your dog?**

|           | <10 min | 10-30 min | 30-60 min | >60 min | No specification |
|-----------|---------|-----------|-----------|---------|------------------|
| In summer |         |           |           |         |                  |
| In winter |         |           |           |         |                  |

**How long does your dog need to recover after exercise?**

|           | Up to 5 min | Up to 15 min | Up to 30 min | Up to 60 min | No specification |
|-----------|-------------|--------------|--------------|--------------|------------------|
| In summer |             |              |              |              |                  |
| In winter |             |              |              |              |                  |

**At what temperature do the signs start to worsen (exercise intolerance, problems breathing)? (Please tick)**

➔

1011121314151617181920212223242526272829 °C

No worsening ☐ No specification ☐

|                                                          | Strongly agree | Rather agree | Neither | Rather not agree | Do not agree | No specification |
|----------------------------------------------------------|----------------|--------------|---------|------------------|--------------|------------------|
| My dog does not like hot summer days.                    |                |              |         |                  |              |                  |
| My dog prefers to rest rather than exercise on hot days. |                |              |         |                  |              |                  |
| My dog pants more on hot days.                           |                |              |         |                  |              |                  |
| My dog doesn't have a problem with heat.                 |                |              |         |                  |              |                  |
| At home, my dog lies down right after a walk.            |                |              |         |                  |              |                  |
| My dog avoids the sun on hot days.                       |                |              |         |                  |              |                  |
| I feel like my dog can't find rest on hot days.          |                |              |         |                  |              |                  |
| On warm summer days, my dog gets tired quickly.          |                |              |         |                  |              |                  |

**My dog is snoring:**

|            |                    |                     |                         |                          |       |
|------------|--------------------|---------------------|-------------------------|--------------------------|-------|
| Constantly | Often (once daily) | Daily (1 x per day) | Regularly (1x per week) | Rarely ( < 1x per month) | Never |
|------------|--------------------|---------------------|-------------------------|--------------------------|-------|

**My dog presents with an increased respiratory effort\*:**

**At rest:**

|            |                    |                     |                         |                          |       |
|------------|--------------------|---------------------|-------------------------|--------------------------|-------|
| Constantly | Often (once daily) | Daily (1 x per day) | Regularly (1x per week) | Rarely ( < 1x per month) | Never |
|------------|--------------------|---------------------|-------------------------|--------------------------|-------|

**During/ after exercise:**

|            |                    |                     |                         |                          |       |
|------------|--------------------|---------------------|-------------------------|--------------------------|-------|
| Constantly | Often (once daily) | Daily (1 x per day) | Regularly (1x per week) | Rarely ( < 1x per month) | Never |
|------------|--------------------|---------------------|-------------------------|--------------------------|-------|

\* for example nasal flaring, deep breaths or increasing breathing rate, marked movement/ pumping movement of the belly, abduction of the forelegs, stretching of the neck

**Has your dog ever has passed out (= syncope)?**

|          |                         |       |                             |                                    |                            |      |       |
|----------|-------------------------|-------|-----------------------------|------------------------------------|----------------------------|------|-------|
| Constant | Often<br>(> once daily) | Daily | Regular<br>(once per month) | Occasionally<br>(< once per month) | 2 - 3<br>Times in its life | Once | Never |
|----------|-------------------------|-------|-----------------------------|------------------------------------|----------------------------|------|-------|

**Has your dog ever suffered a choking fit?**

|          |                         |       |                            |                                    |                            |      |       |
|----------|-------------------------|-------|----------------------------|------------------------------------|----------------------------|------|-------|
| Constant | Often<br>(> once daily) | Daily | Regular<br>(once per week) | Occasionally<br>(< once per month) | 2 - 3<br>Times in its life | Once | Never |
|----------|-------------------------|-------|----------------------------|------------------------------------|----------------------------|------|-------|

**Has your dog ever had a blue discoloration of his mucous membranes (= cyanosis, visible on gums and tongue)?**

|          |                         |       |                            |                                    |                            |      |       |
|----------|-------------------------|-------|----------------------------|------------------------------------|----------------------------|------|-------|
| Constant | Often<br>(> once daily) | Daily | Regular<br>(once per week) | Occasionally<br>(< once per month) | 2 - 3<br>Times in its life | Once | Never |
|----------|-------------------------|-------|----------------------------|------------------------------------|----------------------------|------|-------|

**Has your dog ever shown "reverse sneezing"?**

|          |                         |       |                             |                                    |                            |      |       |
|----------|-------------------------|-------|-----------------------------|------------------------------------|----------------------------|------|-------|
| Constant | Often<br>(> once daily) | Daily | Regular<br>(once per month) | Occasionally<br>(< once per month) | 2 - 3<br>Times in its life | Once | Never |
|----------|-------------------------|-------|-----------------------------|------------------------------------|----------------------------|------|-------|

|                                                                      | Strongly agree | Rather agree | Neither | Rather not agree | Do not agree | No specification |
|----------------------------------------------------------------------|----------------|--------------|---------|------------------|--------------|------------------|
| My dog sleeps quietly and deeply.                                    |                |              |         |                  |              |                  |
| My dog can sleep badly to not at all.                                |                |              |         |                  |              |                  |
| My dog can only sleep well when the chin is in an elevated position. |                |              |         |                  |              |                  |
| My dog snores more in certain positions.                             |                |              |         |                  |              |                  |

**Does your dog have breathing pauses during sleep (= sleep apnoea):**

|          |                         |       |                             |                                    |                            |      |       |                   |
|----------|-------------------------|-------|-----------------------------|------------------------------------|----------------------------|------|-------|-------------------|
| Constant | Often<br>(> once daily) | Daily | Regular<br>(once per month) | Occasionally<br>(< once per month) | 2 - 3<br>Times in its life | Once | Never | No specific ation |
|----------|-------------------------|-------|-----------------------------|------------------------------------|----------------------------|------|-------|-------------------|

**Does your dog have choking fits during sleep:**

|          |                         |       |                             |                                    |                            |      |       |                   |
|----------|-------------------------|-------|-----------------------------|------------------------------------|----------------------------|------|-------|-------------------|
| Constant | Often<br>(> once daily) | Daily | Regular<br>(once per month) | Occasionally<br>(< once per month) | 2 - 3<br>Times in its life | Once | Never | No specific ation |
|----------|-------------------------|-------|-----------------------------|------------------------------------|----------------------------|------|-------|-------------------|

**Food:**

**Type:** (e.g. dry, wet, BARF, homemade diet):

\_\_\_\_\_

**Meals:** \_\_\_\_/Day

**How do you evaluate your dog's body condition?**

- ☐ My dog is slightly overweight
- ☐ My dog is very overweight
- ☐ My dog has ideal weight
- ☐ My dog is slightly underweight
- ☐ My dog is very underweight

**Has your dog ever suffered from the following problems during feeding? If yes, how often?**

|                                          | Constantly | Daily | Regularly | Rarely | Never |
|------------------------------------------|------------|-------|-----------|--------|-------|
| Increased salivation                     |            |       |           |        |       |
| Regurgitation*                           |            |       |           |        |       |
| Vomiting**                               |            |       |           |        |       |
| Choking on food/ difficulties swallowing |            |       |           |        |       |
| Dyspnoea during feeding                  |            |       |           |        |       |

\* regurgitation = mostly appearing directly after feeding, usually no signs to at most mild retching before regurgitation, food is discharged through the muzzle with seemingly little to no effort

\*\* vomiting = usually announces itself before act, dog is apathic, uneasy or restless, trembling, salivating, smacking, dog retches strongly, abdominal wall is contracting visibly

**My dog drinks**

- ☐ little
- ☐ a normal amount
- ☐ a lot of water

**These drinking habits**

- ☐ are unchanged
- ☐ These drinking habits have recently changed

If yes, since when and how? \_\_\_\_\_

**Urination:**

- ☐ normal
- ☐ less than usual
- ☐ more than usual

**Defecation:**

- ☐ normal
- ☐ less than usual
- ☐ more than usual

**Diarrhea:**    yes ☐    no ☐    occasionally ☐

**In your opinion, what is the most restricting problem for your dog in everyday life?**

- ☐ exercise intolerance  
What precisely? \_\_\_\_\_
- ☐ breathing restrictions
- ☐ heat intolerance
- ☐ restrictions during feeding
- ☐ no restrictions
- ☐ no specification

**Before acquiring the dog, did you know that breathing problems can occur in this breed?**

Yes ☐            No ☐            Additional comments: \_\_\_\_\_

**Would you get a dog of a brachycephalic breed again?**

Yes ☐            No ☐

Some questions were modified or compiled from the following publications:

Packer RMA, Hendricks A, Burn CC. Do dog owners perceive the clinical signs related to conformational inherited disorders as 'normal' for the breed? A potential constraint to improving canine welfare. Anim Welf. 2012;21(1):81-93.

Poncet CM, Dupre GP, Freiche VG, Estrada MM, Poubanne YA, Bouvy BM. Prevalence of gastrointestinal tract lesions in 73 brachycephalic dogs with upper respiratory syndrome. J Small Anim Pract. 2005;46(6):273-9.

Roedler FS, Pohl S, Oechtering GU. How does severe brachycephaly affect dog's lives? Results of a structured preoperative owner questionnaire. Vet J. 2013;198(3):606-10.
